# Supplementary material
Source: Royal Society of Chemistry journal article supplement (doi:10.1039/d6gc01524g)
Supplement: d6gc01524g1.pdf [file d6gc01524g1.pdf]

## Supporting Information

# Electronic Engineering of Ni<sub>3</sub>S<sub>2</sub> via Mo/Cl Co-doping for Upcycling Polyethylene Terephthalate into Formate with Concurrent Hydrogen Evolution

Guoen Zhang,<sup>†a</sup> Chuanshun Feng,<sup>†a</sup> Feng Lin,<sup>a</sup> Huan Ye,<sup>a</sup> Wenqi Wei,<sup>a</sup> Qicheng Zhang,<sup>a</sup> Xiaobin Fan,<sup>ab</sup> Wenchao Peng<sup>ab</sup> and Yang Li<sup>\*ab</sup>

<sup>a</sup> School of Chemical Engineering and Technology, State Key Laboratory of Chemical Engineering and Low-Carbon Technology, Collaborative Innovation Center of Chemical Science and Engineering, Tianjin University, Tianjin 300354, China

<sup>b</sup> Zhejiang Institute of Tianjin University, Shaoxing, Zhejiang 312300, China

<sup>†</sup> These two authors contributed equally to this work

\*Corresponding author, E-mail: liyang1895@tju.edu.cn

## S1. Techno-economic assessment

The calculation process as follows:

### (1) Input chemicals costs:

The costs associated with the required input chemicals are calculated as follows: 1 ton PET (390 \$/t)<sup>1</sup>, 1.13 tons KOH (1126 \$/t)<sup>2</sup>, 10 tons water (0.22 \$/t)<sup>3</sup> and 0.53 tons formic acid (400 \$/t)<sup>4</sup>.

Thus, the input chemicals is:

$$\text{Costs} = (1 \times 390) + (1.13 \times 1126) + (10 \times 0.22) + (0.53 \times 400) = 1876.6 \$$$

### (2) Electricity costs:

The total charge required for electrochemical PET upgrading per ton is determined by:

$$Q = \frac{N \times F \times n}{FE} = \frac{4770 \times 96485 \times 6}{0.82} = 3.36 \times 10^9 \text{ C}$$

Where  $Q$  is the total charge,  $N$  is the moles of EG per ton of PET,  $F$  is the Faraday constant (96485 C mol<sup>-1</sup>),  $n$  is the number of electron transfer (6), and  $FE$  is the Faradaic efficiency of formate production.

The power consumption is then calculated as:

$$P = \frac{U \times Q}{3600 \times f} = \frac{1.61 \times 3.36 \times 10^9}{3600 \times 0.8} = 1878.3 \text{ kWh}$$

Where  $U$  is the cell potential (1.61 V),  $f$  is a capacity factor (0.8). Assuming an electricity price of 0.07 \$/kWh, the electricity cost amounts to:

$$\text{Electricity costs} = 1878.3 \times 0.07 = 131.4 \$$$

### (3) Separation and purification costs

Separation and purification costs, estimated as 20% of the electricity costs, are given by:

$$\text{Separation and purification cost} = 131.4 \times 0.2 = 26.3 \$$$

### (4) Miscellaneous costs

Miscellaneous costs, covering capital costs, Installation costs, balance of plant, operational costs, and maintenance costs, are estimated at 10% of the total costs

incurred thus far:

$$\text{Miscellaneous cost} = (1876.6 + 131.4 + 26.3) \times 0.1 = 203.4 \text{ \$}$$

(5) Total cost of PET upcycling:

$$\text{Total cost} = 1876.6 + 131.4 + 26.3 + 203.4 = 2237.7 \text{ \$}$$

(6) After electrolysis, 1 ton of PET feedstock finally yields 1.67 tons of HCOOK (852 \$/t)<sup>5</sup>, 0.84 tons of TPA (1260 \$/t)<sup>6</sup> and 0.037 tons of H<sub>2</sub> (4800 \$/t)<sup>5</sup>.

The corresponding product value is:

$$\text{Product value} = (1.67 \times 852) + (0.84 \times 1260) + (0.037 \times 4800) = 2658.8 \text{ \$}$$

The net profit from electrolysis per ton of PET is calculated as:

$$\text{Total profit} = \text{Product value} - \text{Total Cost} = 2658.8 - 2237.7 = 421.1 \text{ \$}$$

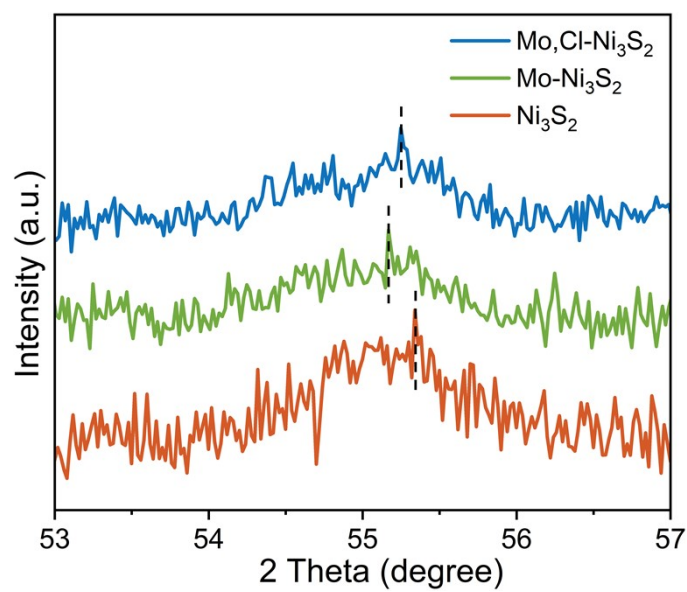

**Fig. S1** XRD patterns of Mo,Cl-Ni<sub>3</sub>S<sub>2</sub>, Mo-Ni<sub>3</sub>S<sub>2</sub> and Ni<sub>3</sub>S<sub>2</sub>.

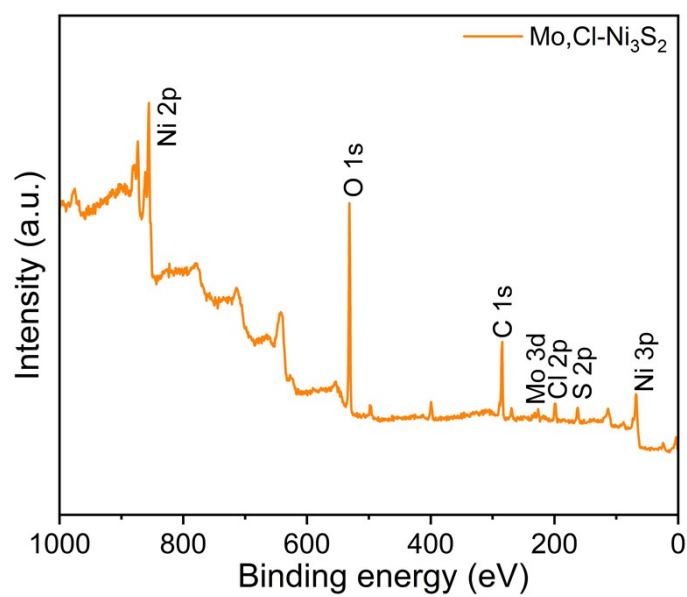

**Fig. S2** XPS survey spectrum of Mo,Cl-Ni<sub>3</sub>S<sub>2</sub>.

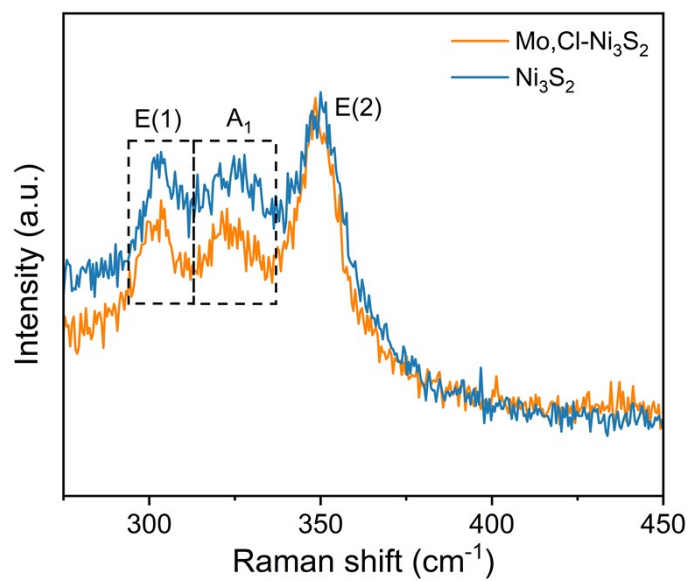

**Fig. S3** Raman spectra of Mo,Cl-Ni<sub>3</sub>S<sub>2</sub> and Ni<sub>3</sub>S<sub>2</sub>.

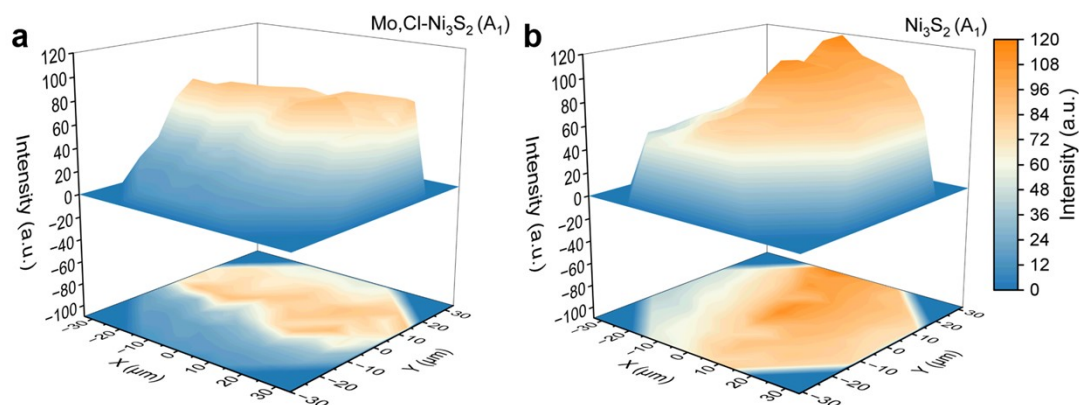

**Fig. S4** Raman spectra heatmap of the A<sub>1</sub> vibrational mode of (a) Mo,Cl-Ni<sub>3</sub>S<sub>2</sub> and (b) Ni<sub>3</sub>S<sub>2</sub>.

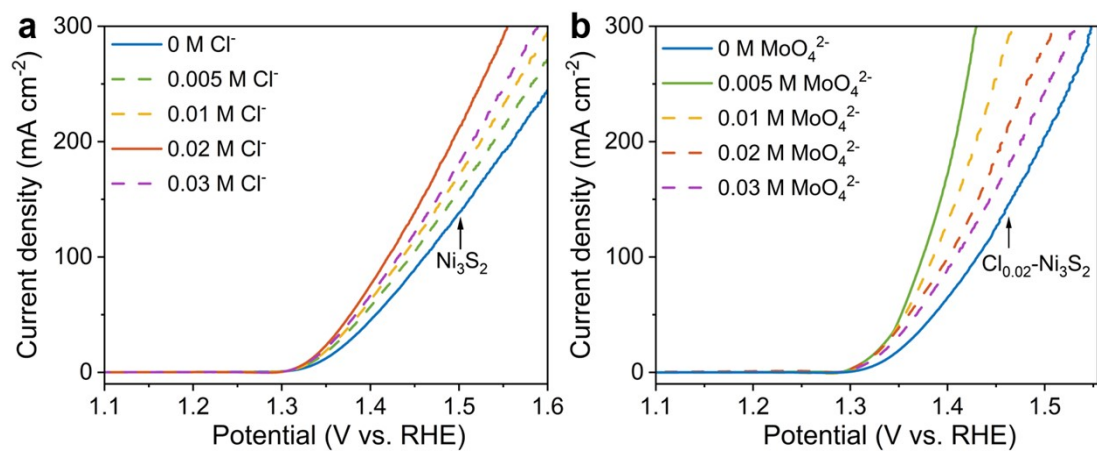

**Fig. S5** (a) Effect of Cl<sup>-</sup> doping level on the catalytic performance of Ni<sub>3</sub>S<sub>2</sub>. (b) Effect of MoO<sub>4</sub><sup>2-</sup> doping level on the catalytic performance of Cl<sub>0.01</sub>-Ni<sub>3</sub>S<sub>2</sub> (Cl<sub>0.01</sub> means the dosage of Cl<sup>-</sup> precursor is 0.01 M).

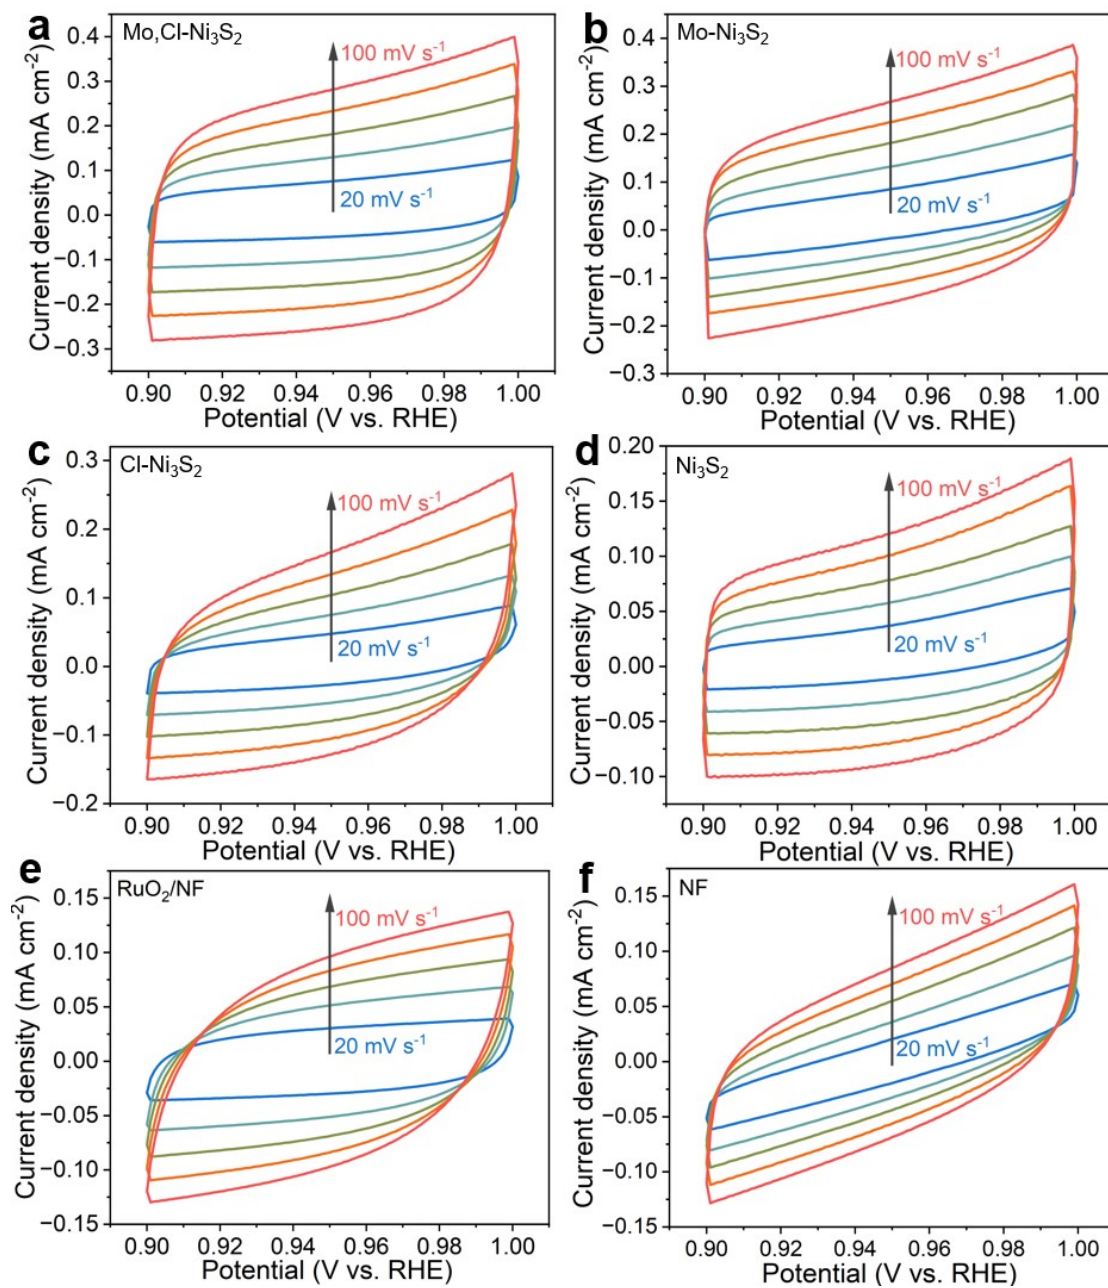

**Fig. S6** CV of (a) Mo,Cl-Ni<sub>3</sub>S<sub>2</sub>, (b) Mo-Ni<sub>3</sub>S<sub>2</sub>, (c) Cl-Ni<sub>3</sub>S<sub>2</sub>, (d) Ni<sub>3</sub>S<sub>2</sub> (e) RuO<sub>2</sub>/NF and (f) NF at different scan rates (from 20 to 100 mV s<sup>-1</sup> with an increment of 20 mV s<sup>-1</sup>).

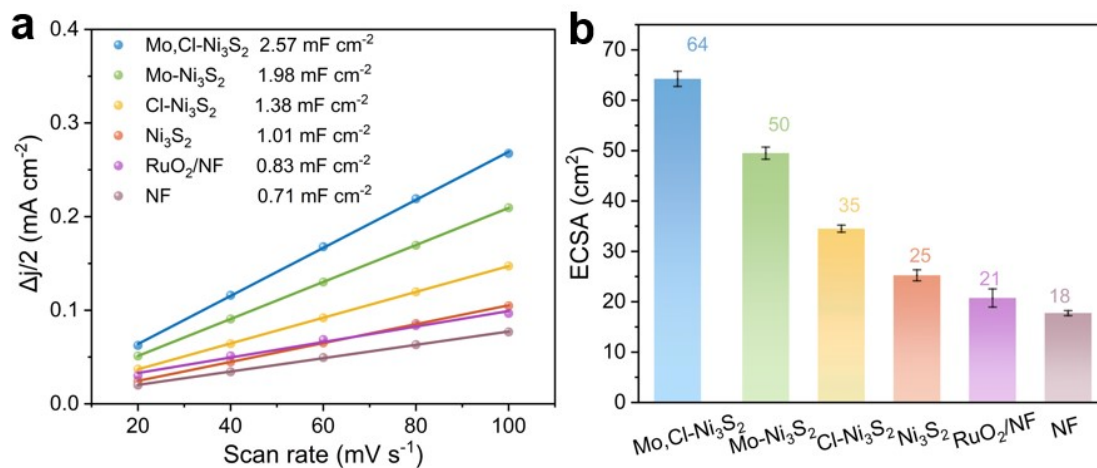

**Fig. S7** (a) The difference in current density ( $\Delta j = (j_a - j_c)/2$ ) plots against the scan rate of Mo,Cl-Ni<sub>3</sub>S<sub>2</sub>, Mo-Ni<sub>3</sub>S<sub>2</sub>, Cl-Ni<sub>3</sub>S<sub>2</sub>, Ni<sub>3</sub>S<sub>2</sub>, RuO<sub>2</sub>/NF and NF. (b) ECSA values of catalysts.

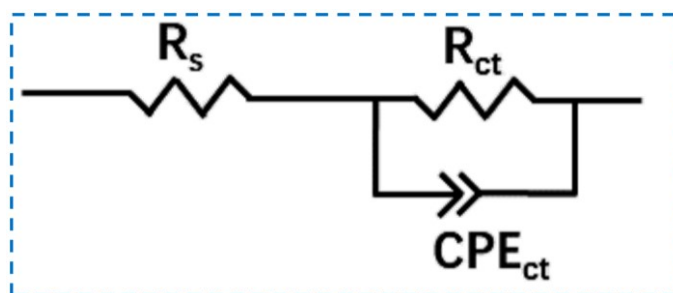

**Fig. S8** Equivalent circuit model for EIS data fitting.

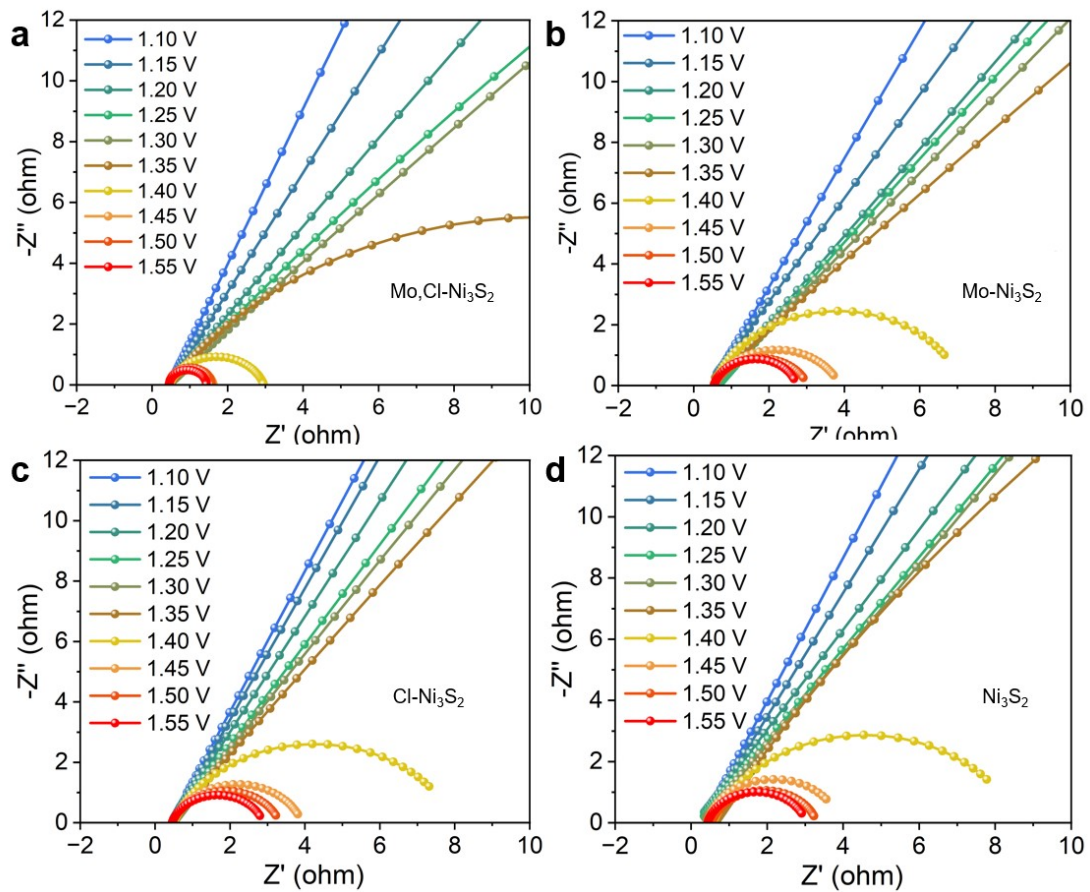

**Fig. S9** Nyquist plots of (a)  $\text{Mo,Cl-Ni}_3\text{S}_2$ , (b)  $\text{Mo-Ni}_3\text{S}_2$ , (c)  $\text{Cl-Ni}_3\text{S}_2$ , and (d)  $\text{Ni}_3\text{S}_2$ .

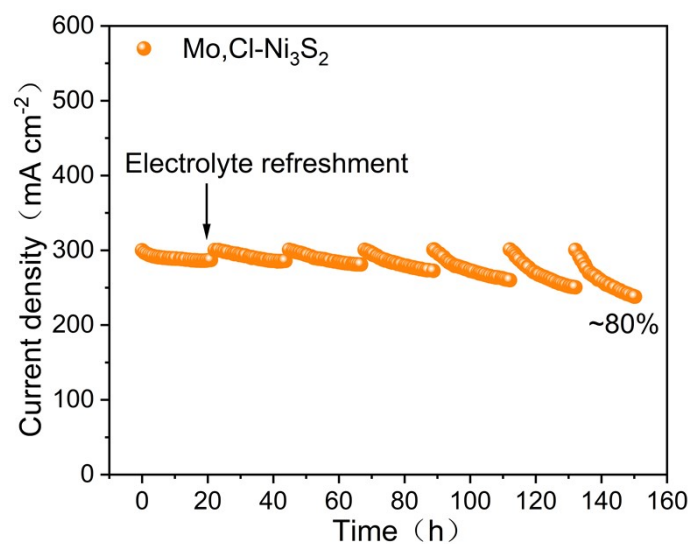

**Fig. S10** The chronoamperometric curves of  $\text{Mo,Cl-Ni}_3\text{S}_2$  for the 150 h EGOR test.

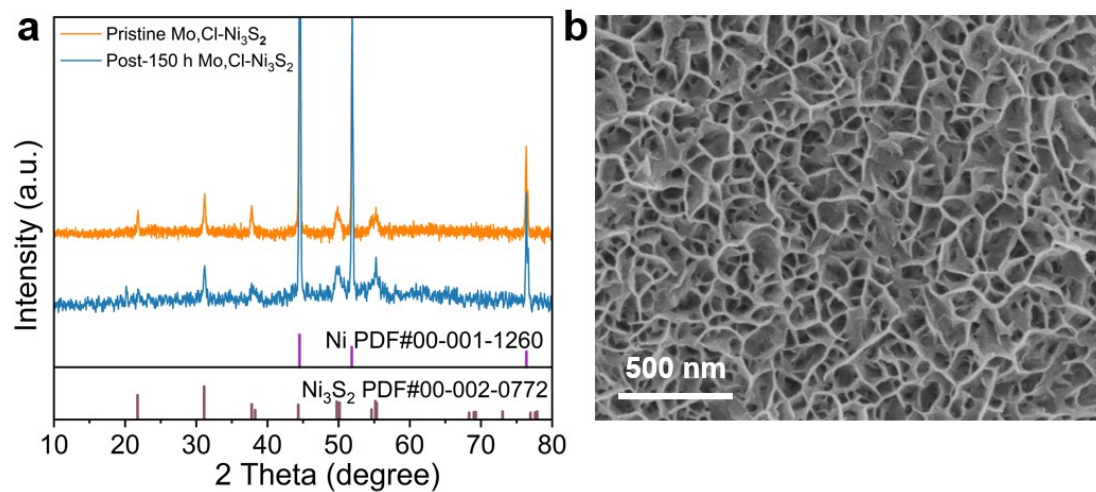

**Fig. S11** (a) XRD and (b) SEM images of Mo,Cl-Ni<sub>3</sub>S<sub>2</sub> after 150 h stability test.

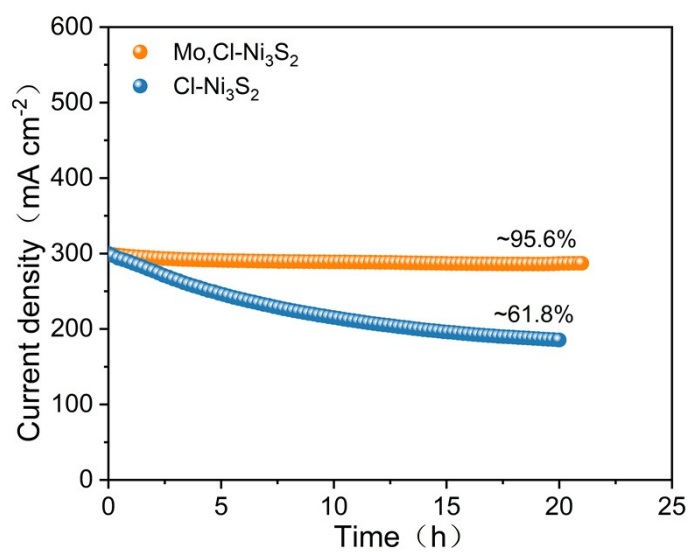

**Fig. S12** Comparison of the long-term stability between Mo,Cl-Ni<sub>3</sub>S<sub>2</sub> and Cl-Ni<sub>3</sub>S<sub>2</sub>.

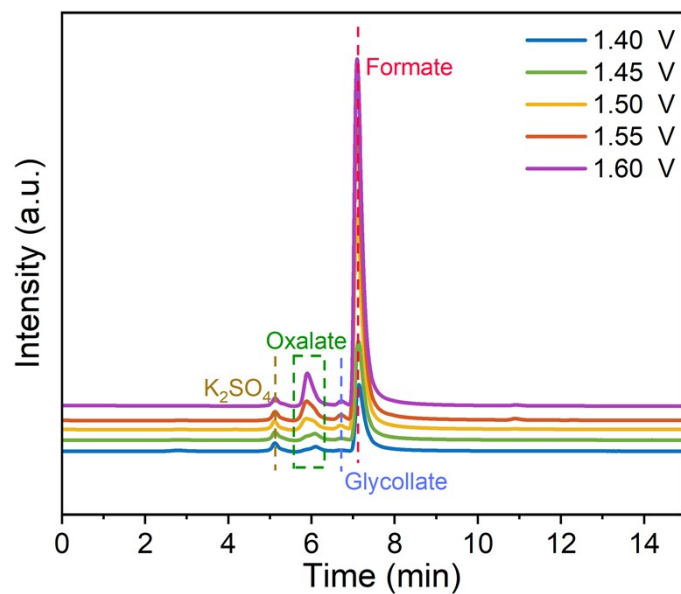

**Fig. S13** HPLC products of EGOR at different potentials.

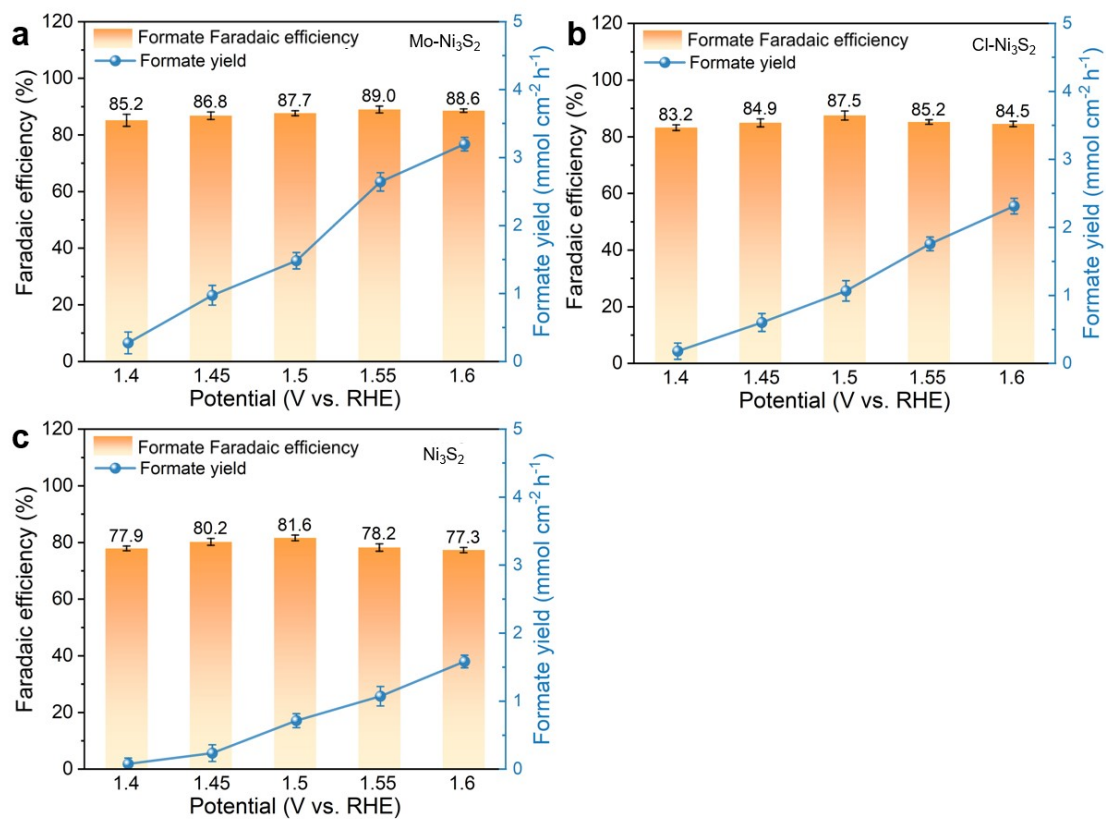

**Fig. S14** Faradaic efficiency and yield for formate production of (a) Mo-Ni<sub>3</sub>S<sub>2</sub>, (b) Cl-Ni<sub>3</sub>S<sub>2</sub>, and (c) Ni<sub>3</sub>S<sub>2</sub> at different potentials.

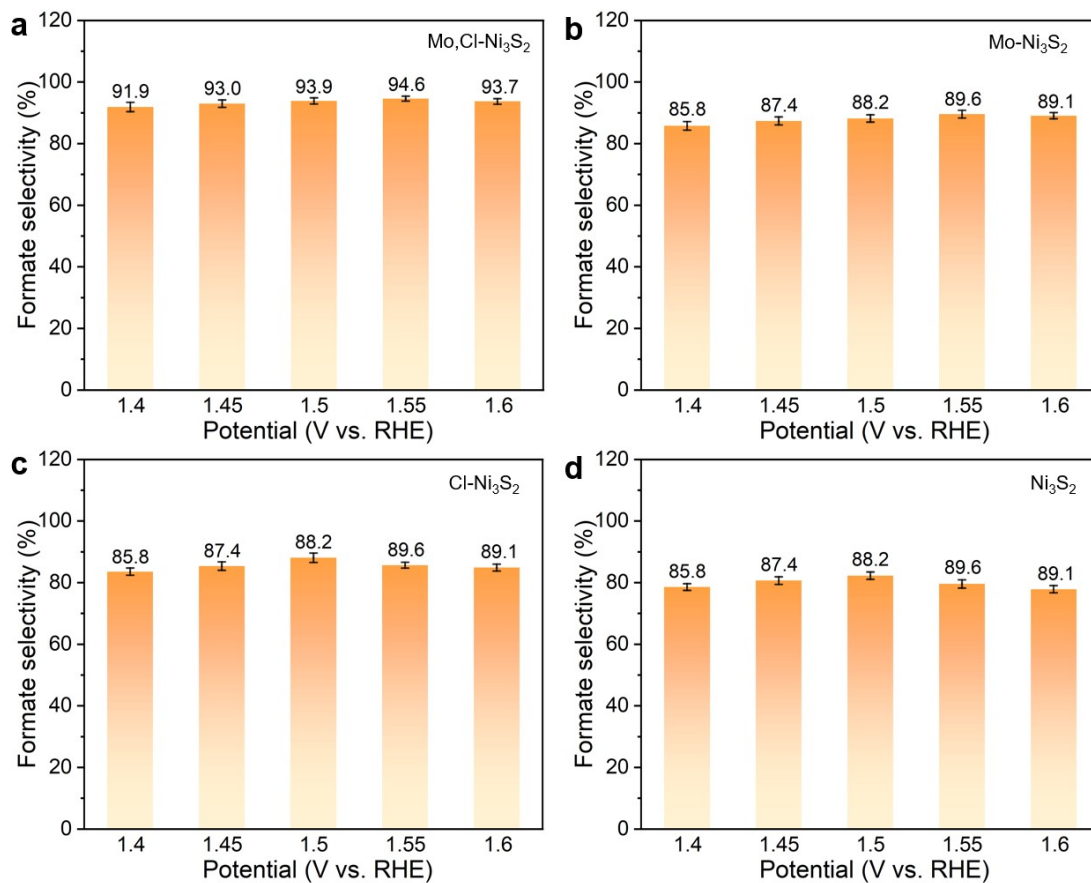

**Fig. S15** Formate selectivity of (a) Mo,Cl-Ni<sub>3</sub>S<sub>2</sub>, (b) Mo-Ni<sub>3</sub>S<sub>2</sub>, (c) Cl-Ni<sub>3</sub>S<sub>2</sub>, and (d) Ni<sub>3</sub>S<sub>2</sub> at varied applied voltages.

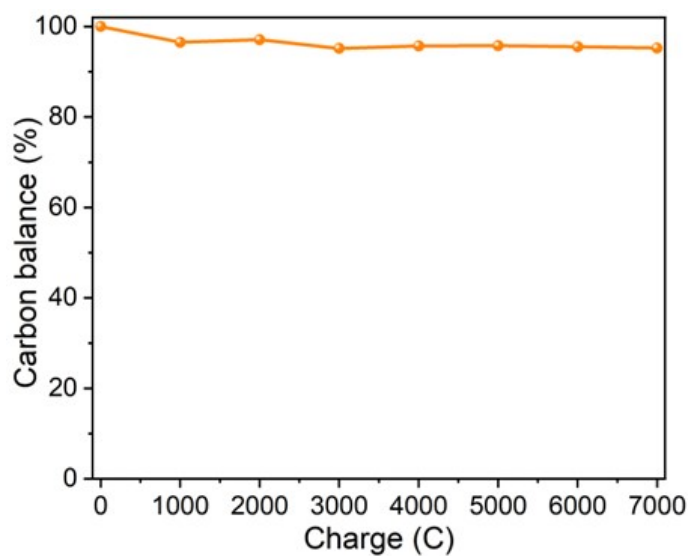

**Fig. S16** Carbon balance of EGOR at different input charges.

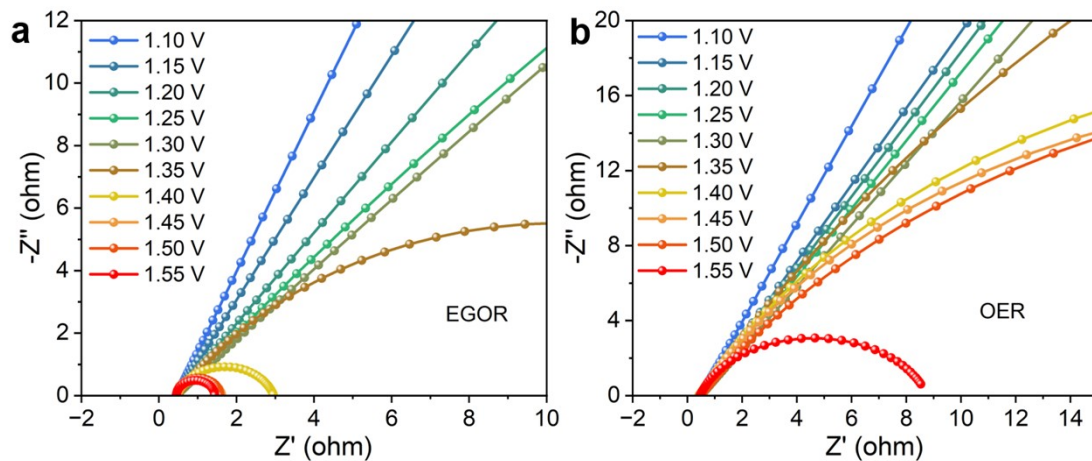

**Fig. S17** Nyquist plots of Mo<sub>2</sub>Cl-Ni<sub>3</sub>S<sub>2</sub> for (a) OER and (b) EGOR.

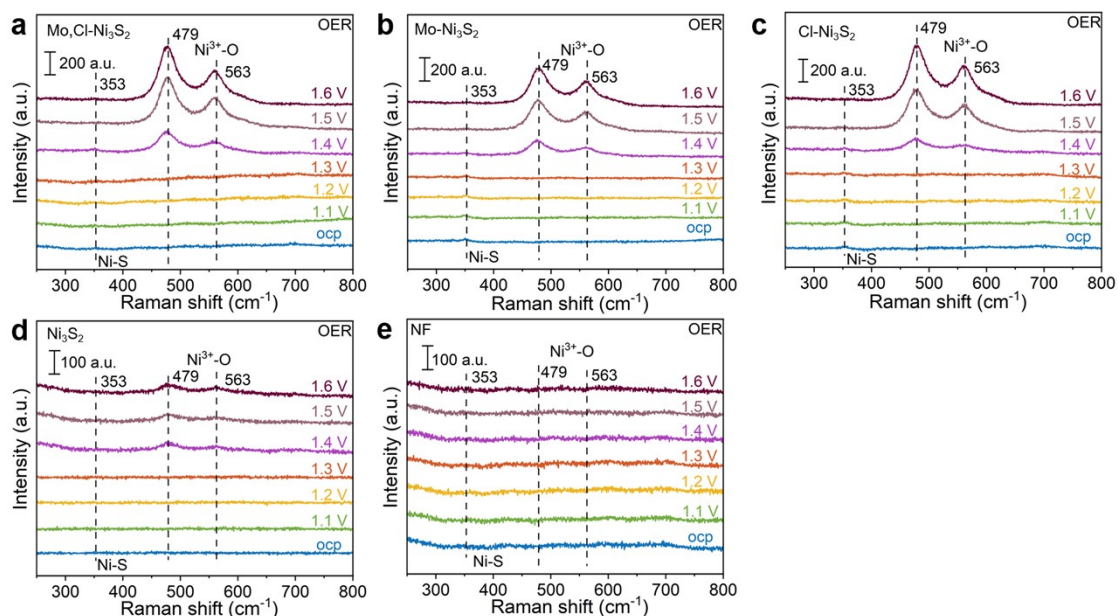

**Fig. S18** *In situ* Raman spectra of (a) Mo<sub>2</sub>Cl-Ni<sub>3</sub>S<sub>2</sub>, (b) Mo-Ni<sub>3</sub>S<sub>2</sub>, (c) Cl-Ni<sub>3</sub>S<sub>2</sub>, (d) Ni<sub>3</sub>S<sub>2</sub>, and (e) Ni<sub>3</sub>S<sub>2</sub>.

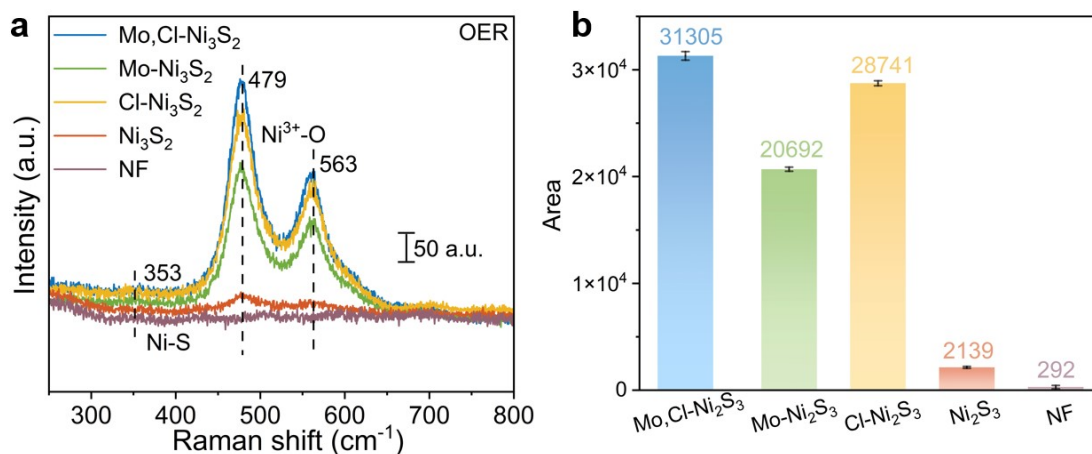

**Fig. 19** (a) Comparison of *in situ* Raman peaks at 1.5 V vs. RHE. (b) The corresponding Raman peak area of NiOOH at 1.5 V vs. RHE.

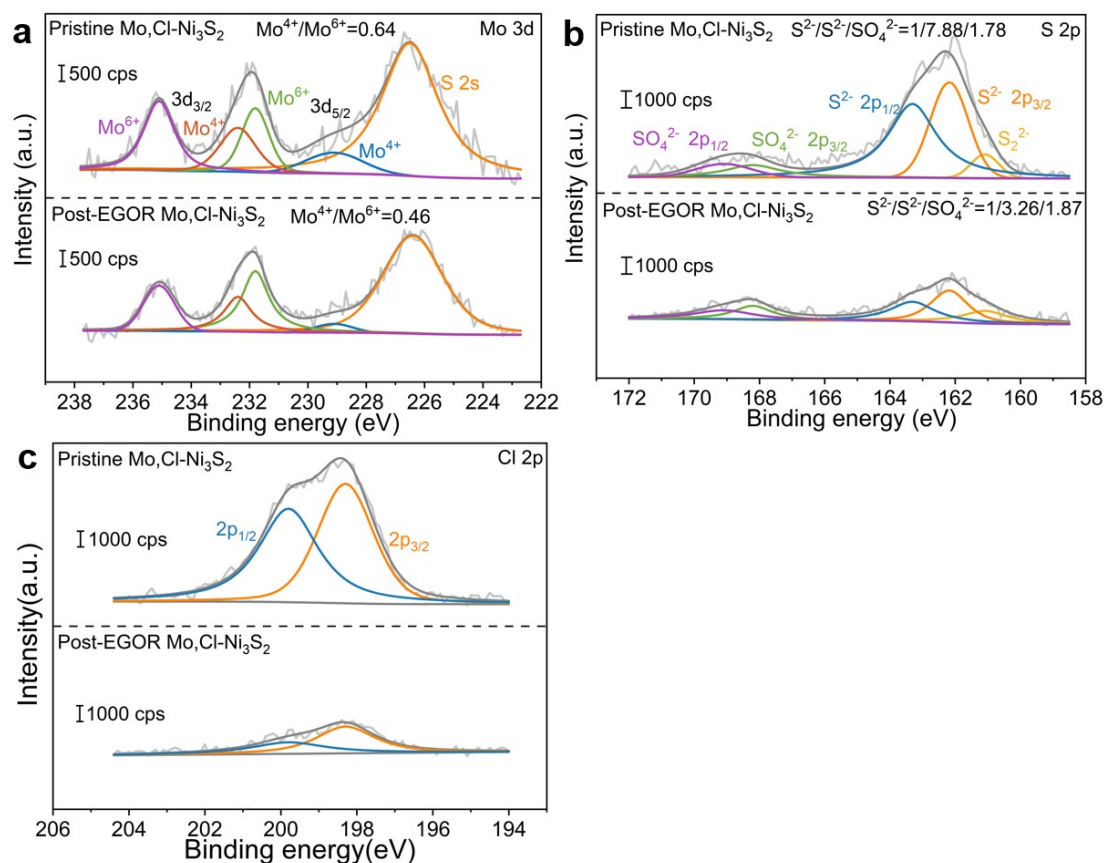

**Fig. S20** (a) Mo 3d, (b) S 2p and (c) Cl 2p XPS spectra of Mo,Cl-Ni<sub>3</sub>S<sub>2</sub> before and after EGOR process.

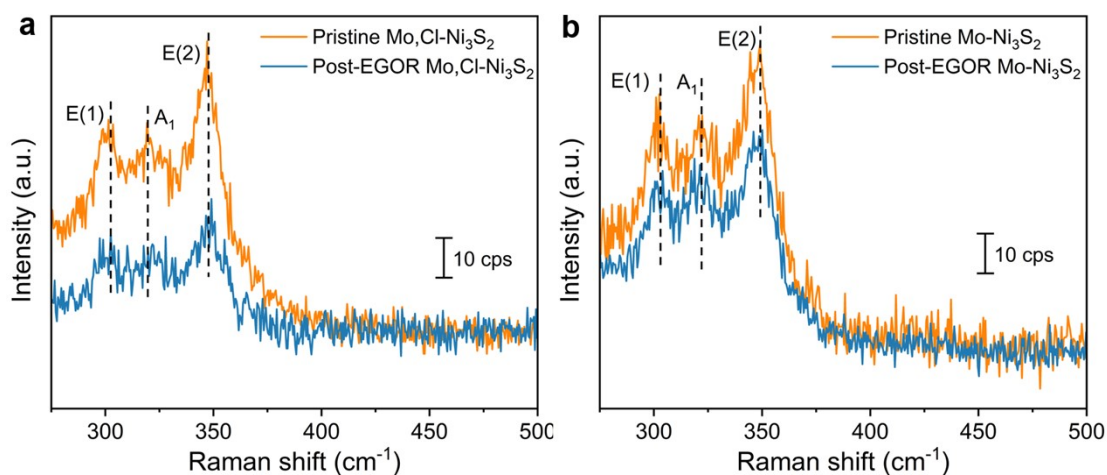

**Fig. S21** Raman spectra of (a) Mo,Cl-Ni<sub>3</sub>S<sub>2</sub> and (b) Mo-Ni<sub>3</sub>S<sub>2</sub> before and after EGOR process.

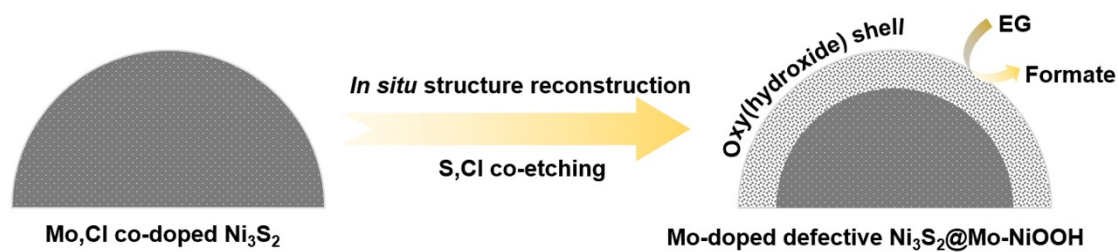

**Fig. S22** Illustration of the self-reconstruction process of Mo,Cl-Ni<sub>3</sub>S<sub>2</sub>.

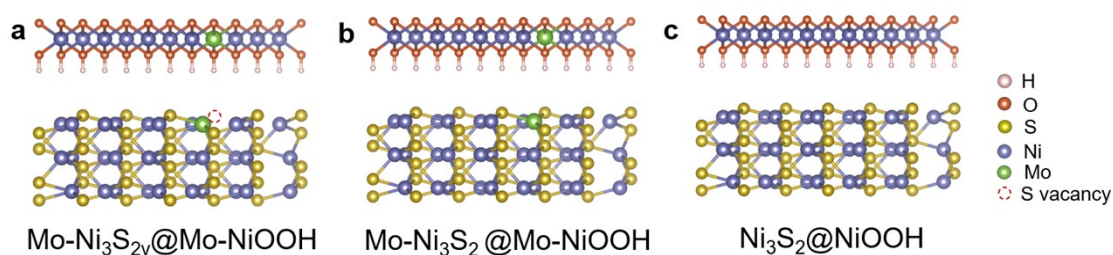

**Fig. S23** Constructed (a) Mo-Ni<sub>3</sub>S<sub>2v</sub>@Mo-NiOOH, (b) Mo-Ni<sub>3</sub>S<sub>2</sub>@Mo-NiOOH, and (c) Ni<sub>3</sub>S<sub>2</sub>@NiOOH models for DFT calculations. Since Cl is a dopant and replace some S sites in the Ni<sub>3</sub>S<sub>2</sub> crystal structure, the electrochemical etching of Cl will thus lead to S vacancy.

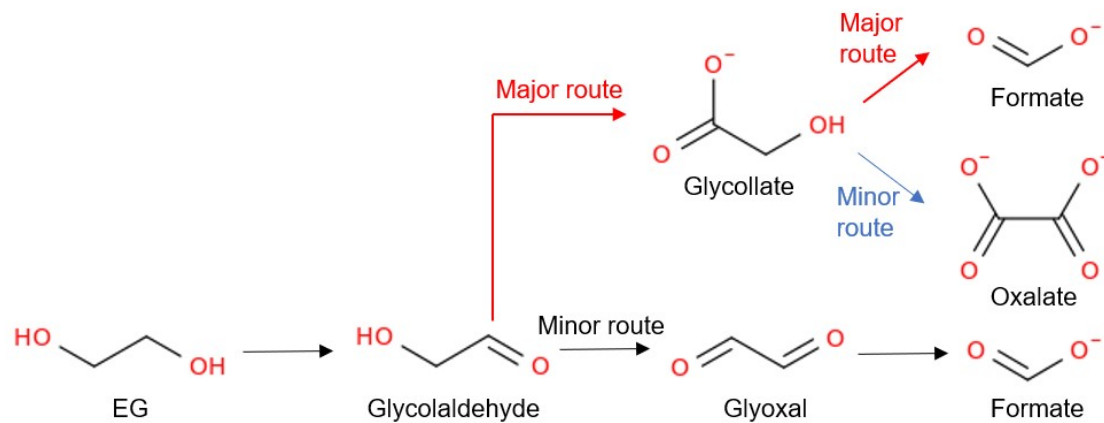

**Fig. S24** Proposed reaction pathway for the electrocatalytic glycol conversion.

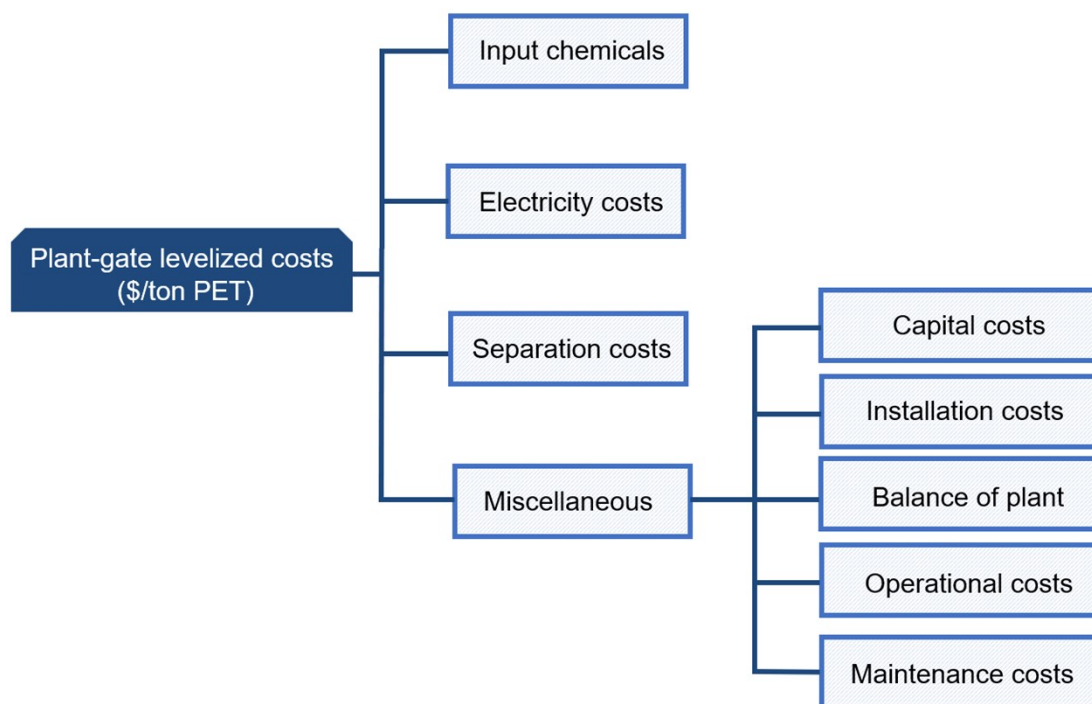

**Fig. S25** The costs for calculating techno-economic analysis of electrolytic PET wastes conversion.

**Table S1** A summary of OER properties of Mo,Cl-Ni<sub>3</sub>S<sub>2</sub> and state-of-the-art TM-based catalysts in 1 M KOH.

| Catalyst                                                                                          | $\eta_{10}$ (mV) | References                                                  |
|---------------------------------------------------------------------------------------------------|------------------|-------------------------------------------------------------|
| CoMnOOH                                                                                           | 256              | <i>Angew. Chem. Int. Ed.</i> , 2024, 63, e202408005.        |
| MEC-2                                                                                             | 258              | <i>Nat. Commun.</i> , 2025, 16:4389.                        |
| FeCoS <sub>x</sub> -PBA                                                                           | 266              | <i>J. Mater. Chem. A</i> , 2022, 10, 19757-19768.           |
| CoNiS <sub>x</sub> /NF                                                                            | 306              | <i>ACS Appl. Nano Mater.</i> , 2024, 7, 9062-9067.          |
| CeO <sub>2</sub> (Co <sub>3</sub> O <sub>4</sub> /CeO <sub>2</sub> )                              | 297              | <i>Dalton Trans.</i> , 2024, 53, 5484-5494.                 |
| CoFeBTC-MOF                                                                                       | 261              | <i>Colloids Surf., A</i> 2022, 651, 129766.                 |
| Ni <sub>2.5</sub> Co <sub>5</sub> C <sub>2</sub> O <sub>4</sub>                                   | 330              | <i>Nanoscale Adv.</i> , 2021, 3, 3770-3779.                 |
| Ni <sub>0.8</sub> Fe <sub>0.2</sub>                                                               | 264              | <i>Langmuir</i> , 2025, 41, 23621-23631.                    |
| Co <sub>0.6</sub> Fe <sub>0.4</sub> C <sub>2</sub> O <sub>4</sub>                                 | 292              | <i>ACS Appl. Mater. Interfaces</i> , 2025, 17, 46874-46886. |
| RuO <sub>x</sub> /γ-MnO <sub>2</sub>                                                              | 255              | <i>Adv. Funct. Mater.</i> , 2025, e17063.                   |
| H <sup>+</sup> -LSE <sub>x</sub> O                                                                | 270              | <i>J. Power Sources</i> , 2025, 644, 237084.                |
| MoO <sub>3</sub> @NF                                                                              | 288              | <i>Int. J. Hydrogen Energy</i> , 2025, 127, 137-146.        |
| Ni <sub>3</sub> Fe-CNT                                                                            | 301              | <i>Molecules</i> , 2025, 30, 208.                           |
| FeCoNiCuYP/C                                                                                      | 259              | <i>Adv. Mater.</i> , 2025, 37, 2410295.                     |
| Co <sub>2</sub> P/FeP                                                                             | 257              | <i>J. Mater. Chem. A</i> , 2024, 12, 31518-31525.           |
| (Ni <sub>87</sub> Fe <sub>4</sub> Cr <sub>9</sub> ) <sub>78</sub> Si <sub>8</sub> B <sub>14</sub> | 295              | <i>Int. J. Hydrogen Energy</i> , 2024, 92, 174-185.         |
| CCO5                                                                                              | 337              | <i>J. Electroanal. Chem.</i> , 2024, 973, 118677.           |
| NiBDC-A                                                                                           | 293              | <i>Small</i> , 2024, 20, 2407328.                           |
| P-CoMoO <sub>4</sub> -Co <sub>3</sub> O <sub>4</sub>                                              | 279              | <i>Nanoscale</i> , 2024, 16, 18076-18085.                   |
| NiCo-LDH/CN/AgPO                                                                                  | 289              | <i>J. Alloys Compd.</i> , 2024, 1004, 175860.               |
| <b>Mo,Cl-Ni<sub>3</sub>S<sub>2</sub></b>                                                          | <b>254</b>       | <b>This study</b>                                           |

**Table S2** A summary of EGOR properties of Mo,Cl-Ni<sub>3</sub>S<sub>2</sub> and state-of-the-art TM-based catalysts.

| Catalyst                                                | Current density<br>(mA cm <sup>-2</sup> ) | Potential<br>(V vs. RHE) | Electrolyte        | References                                            |
|---------------------------------------------------------|-------------------------------------------|--------------------------|--------------------|-------------------------------------------------------|
| Cu <sub>0.5</sub> Co <sub>0.5</sub> SnO <sub>3.17</sub> | 10                                        | 1.46                     | 1 M KOH + 0.3 M EG | <i>J. Colloid Interface Sci.</i> , 2025, 698, 138018. |
| PdFe/N-CNTs                                             | 10                                        | 1.43                     | 1 M KOH + 0.3 M EG | <i>J. Mater. Chem. A</i> , 2024, 12, 15984.           |
| A-CoFeNi                                                | 10                                        | 1.36                     | 1 M KOH + 0.3 M EG | <i>Chem. Eng. J.</i> , 2024, 498, 155472.             |
| Mo-Ni <sub>2</sub> P/NF                                 | 50                                        | 1.37                     | 1 M KOH + 0.3 M EG | <i>Appl. Catal. B: Environ.</i> , 2026, 386, 126372.  |
| NiCu <sub>60s</sub> /NF                                 | 100                                       | 1.52                     | 1 M KOH + 0.3 M EG | <i>ACS Catal.</i> , 2024, 14, 5314–5325.              |
| NiCu/NF                                                 | 100                                       | 1.45                     | 1 M KOH + 0.3 M EG | <i>ACS Catal.</i> , 2024, 14, 5314.                   |
| Ni-Fe <sub>3</sub> Se <sub>4</sub> /NF                  | 100                                       | 1.37                     | 1 M KOH + 0.3 M EG | <i>J. Mater. Chem. A</i> , 2026, 14, 1923.            |
| NiCe@NiTe                                               | 100                                       | 1.38                     | 1 M KOH + 0.3 M EG | <i>J. Mater. Chem. A</i> , 2026, 14, 3591–3604.       |
| MoS <sub>2</sub> -<br>(Ni,Fe)S <sub>2</sub> @WC         | 100                                       | 1.41                     | 1 M KOH + 0.3 M EG | <i>Chem. Eng. J.</i> , 534 (2026) 175122.             |
| Ni/Ni <sub>3</sub> N <sub>1-x</sub>                     | 100                                       | 1.38                     | 1 M KOH + 0.3 M EG | <i>J. Mater. Chem. A</i> , 2024, 12, 15772–15780.     |
| 2D-CoNi-PET                                             | 100                                       | 1.41                     | 1 M KOH + 0.3 M EG | <i>Small</i> , 2026, 22, e12758.                      |
| <b>Mo,Cl-Ni<sub>3</sub>S<sub>2</sub></b>                | 10                                        | 1.32                     |                    |                                                       |
|                                                         | 50                                        | 1.35                     | 1 M KOH + 0.3 M EG | <b><i>This study</i></b>                              |
|                                                         | 100                                       | 1.37                     |                    |                                                       |

**Table S3** Calculated charge transfer resistance ( $R_{ct}$ ) and solution resistance ( $R_s$ ) of catalysts obtained from the Nyquist plot during the EIS experiments.

| Catalyst                             | $R_s$ ( $\Omega$ ) | $R_{ct}$ ( $\Omega$ ) |
|--------------------------------------|--------------------|-----------------------|
| Mo,Cl-Ni <sub>3</sub> S <sub>2</sub> | 0.70               | 3.6                   |
| Mo-Ni <sub>3</sub> S <sub>2</sub>    | 0.76               | 6.2                   |
| Cl-Ni <sub>3</sub> S <sub>2</sub>    | 0.79               | 8.3                   |
| Ni <sub>3</sub> S <sub>2</sub>       | 0.82               | 29.4                  |
| NF                                   | 0.85               | 82.4                  |

**Table S4** The charge transfer resistance ( $R_{ct}$ ) of Mo,Cl-Ni<sub>2</sub>S<sub>3</sub> calculated from operando EIS data.

| Potential<br>(V vs. RHE) | EGOR ( $\Omega$ ) | OER ( $\Omega$ ) |
|--------------------------|-------------------|------------------|
| 1.10                     | 1168.15           | 2243.74          |
| 1.15                     | 717.82            | 1079.41          |
| 1.20                     | 353.46            | 723.82           |
| 1.25                     | 155.41            | 506.66           |
| 1.30                     | 92.63             | 421.64           |
| 1.35                     | 19.86             | 148.26           |
| 1.40                     | 2.51              | 57.65            |
| 1.45                     | 1.17              | 55.81            |
| 1.50                     | 1.12              | 50.21            |
| 1.55                     | 0.99              | 8.31             |

## References

- 1 J. Sun, B. Shi, S. Dai, L. Chu, H. Wang and M. Huang, *ACS Catal.*, 2024, **15**, 529-542.
- 2 P. Chen, X. Zhang, C. Li, Y. Zhao, X. Chen, B. Wang and J. Wang, *Chem. Eng. J.*, 2026, **534**, 175166.
- 3 H. Zhou, Y. Ren, Z. Li, M. Xu, Y. Wang, R. Ge, X. Kong, L. Zheng and H. Duan, *Nat. Commun.*, 2021, **12**, 4679.
- 4 Y. Yang, M. Jiang, Y. Wang, Y. Zhang, Y. Wu and D. Wu, *Mater. Today Phys.*, 2025, **56**, 101775.
- 5 Z. Li, P. Wang, G. Han, S. Yang, S. Roy, S. Xiang, J. D. Jimenez, V. K. R. Kondapalli, X. Lyu, J. Li, A. Serov, R. Li, V. Shanov, S. D. Senanayake, A. I. Frenkel, P. M. Ajayan, Y. Sun, T. P. Senftle and J. Wu, *Nat. Commun.*, 2025, **16**, 4850.
- 6 M. Du, Y. Zhang, S. Kang, C. Xu, Y. Ma, L. Cai, Y. Zhu, Y. Chai and B. Qiu, *Small*, 2023, **19**, 2303693.
- 7 M. Du, Y. Zhang, S. Kang, C. Xu, Y. Ma, L. Cai, Y. Zhu, Y. Chai, B. Qiu, *Small*, 2023, **19**, 2303693.
- 8 M. Wang, B. Zhang, J. Ding, F. Zhang, R. Tu, M.T. Bernards, Y. He, P. Xie, Y. Shi, *Small*, 2022, **18**, 2105741.
- 9 F. Liu, X. Gao, R. Shi, E.C.M. Tse, Y. Chen, *Green Chem.*, 2022, **24**, 6571-6577.
- 10 M. Song, Y. Wu, Z. Zhao, M. Zheng, C. Wang, J. Lu, *Adv. Mater.*, 2024, **36**, 2403234.
- 11 J. Sun, B. Shi, S. Dai, L. Chu, H. Wang, M. Huang, *ACS Catal.*, 2024, **15**, 529-542.
- 12 J. Qi, J. Li, X. Meng, Z. Jiang, Z. Wang, Y. Ma, H. Zou, Y. Du, Z. Lin, J. Qiu, *Adv. Energy Mater.*, 2025, **15**, e04208.
- 13 W. Wang, X. He, Z. Tu, D. Xiong, S. Dong, T. Zhang, D. Wu, J. Wang, Z. Chen, *ACS Catal.*, 2025, **15**, 9574-9583.
- 14 W. He, H. Liu, J. Cheng, Y. Li, C. Liu, C. Chen, J. Zhao, H.L. Xin, *ACS Appl. Mater. Interfaces*, 2022, **14**, 6869-6875.
- 15 C. Yan, E. Han, X. Yang, K. Hu, H. Xu, Y. Li, Y. He, S. Lu, *Ceram. Int.*, 2023, **49**, 14155-14165.
- 16 Z. Chen, R. Zheng, T. Bao, T. Ma, W. Wei, Y. Shen, *Nano-Micro Lett.*, 2023, **15**, 210.
